# Supplementary material for: Thrombopoietin receptor agonist antibody for treating chemotherapy-induced thrombocytopenia
Source: Springer Nature journal article supplement (doi:10.1186/s12885-023-10975-3), 2023-05-31
Supplement: MOESM1 [file 25429238]

**Supplementary Fig. 1 Effect of 2R13 on MK differentiation in PB-CD34<sup>+</sup> cells isolated from donor 2**

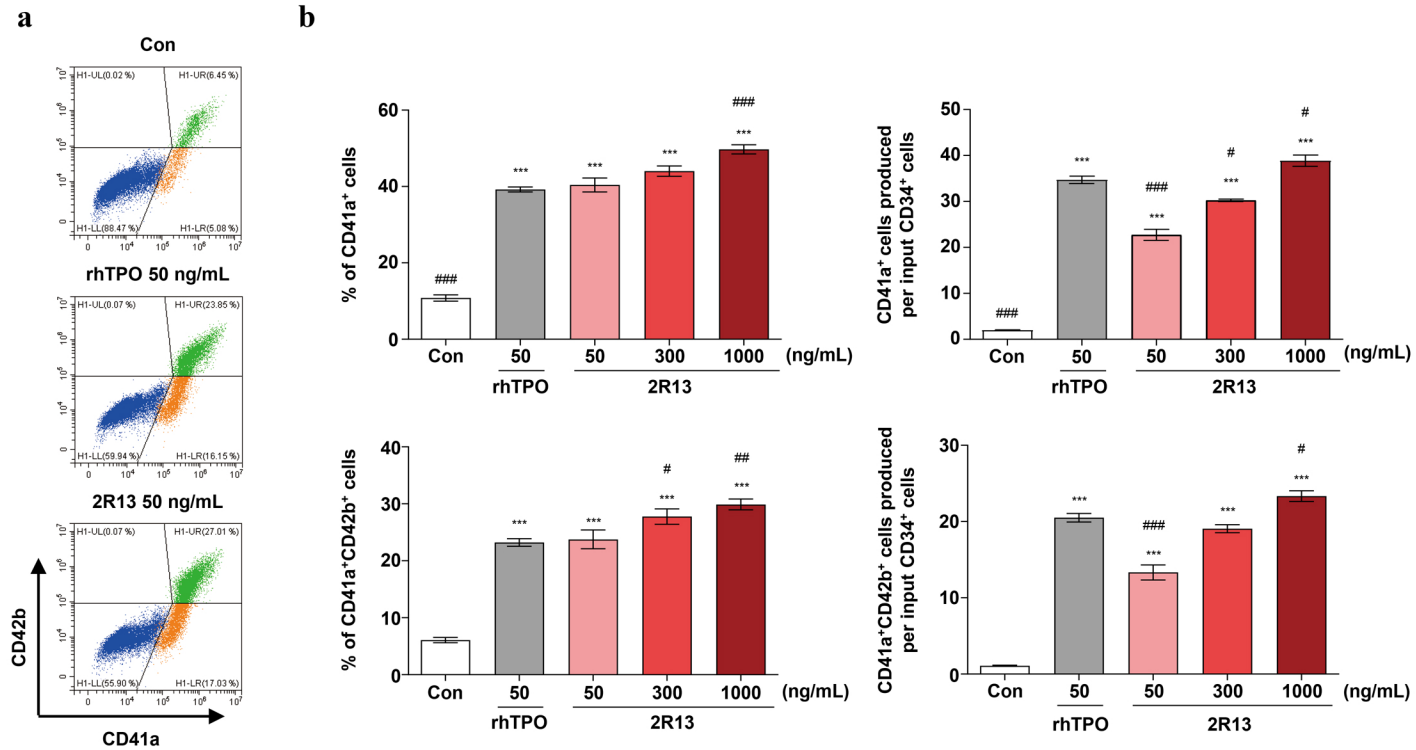

PB-CD34<sup>+</sup> cells derived from donor 2 were stimulated with rhTPO or 2R13 at the indicated concentrations for 11 days. **a** Representative flow cytometric analysis of PB-CD34<sup>+</sup> cell differentiation. **b** Percentage and number of CD41a<sup>+</sup> and CD41a<sup>+</sup>CD42b<sup>+</sup> cells. The number of cells produced per input of PB-CD34<sup>+</sup> cells was calculated by multiplying the number of total nucleated cells with the percentage of CD41a<sup>+</sup> or CD41a<sup>+</sup>CD42b<sup>+</sup> cells. Data are the mean  $\pm$  SD ( $n = 3$ ). One-way ANOVA was used for statistical analysis. \*\*\* $p < 0.001$  vs control; # $p < 0.05$ , ## $p < 0.01$ , and ### $p < 0.001$  vs rhTPO.
