# Supplementary material for: Thrombopoietin receptor agonist antibody for treating chemotherapy-induced thrombocytopenia
Source: Springer Nature journal article supplement (doi:10.1186/s12885-023-10975-3), 2023-05-31
Supplement: MOESM4 [file 25429238]

**Supplementary Fig. 4 Effect of 2R13 on MK polyploidization in PB-CD34<sup>+</sup> cells isolated from donor 3**

**a**

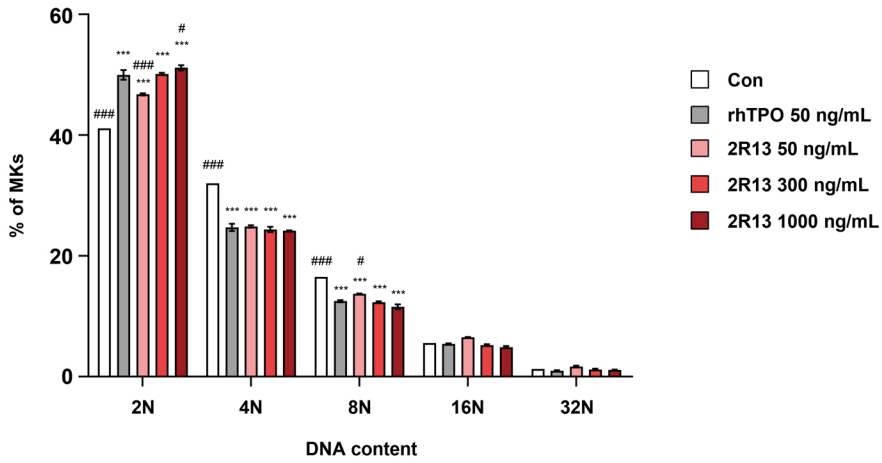

**b**

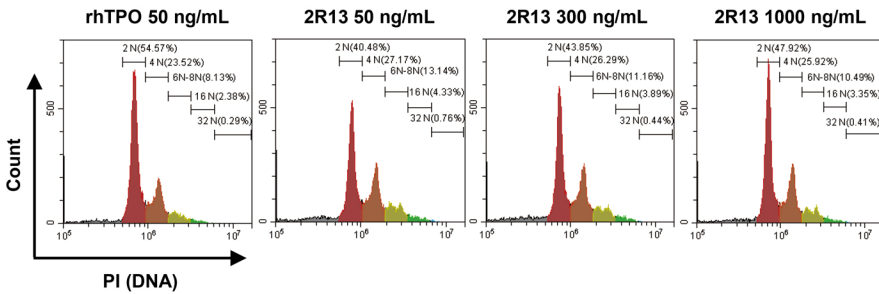

**c**

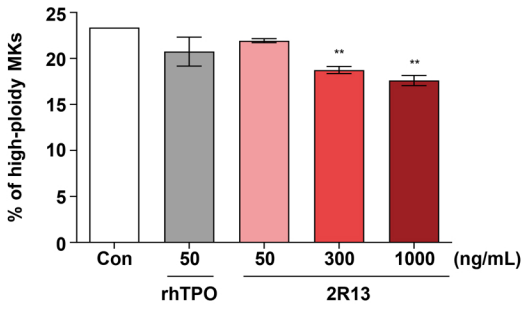

**d**

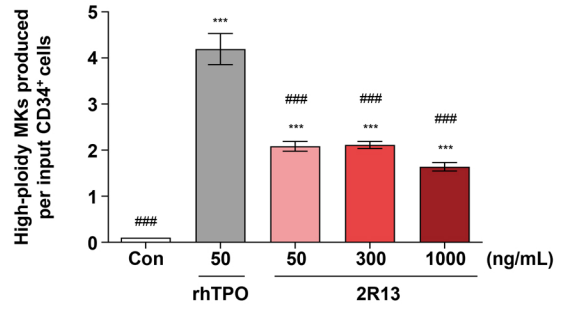

PB-CD34<sup>+</sup> cells derived from donor 3 were stimulated with rhTPO or 2R13 at the indicated concentrations for 13 days. **a** Ploidy status of CD41a<sup>+</sup> cells. **b** Representative flow cytometric profile of ploidy levels. **c, d** Percentage and number of high-ploidy (≥8N) MKs. The number of cells produced per input of PB-CD34<sup>+</sup> cells was calculated by multiplying the number of total nucleated cells with the percentage of high-ploidy CD41a<sup>+</sup> cells. Data are the mean ± SD (*n* = 3). One-way and two-way ANOVA were used for statistical analysis. \*\**p* < 0.01 and \*\*\**p* < 0.001 vs control; #*p* < 0.05 and ###*p* < 0.001 vs rhTPO.
