# Supplementary material for: Thrombopoietin receptor agonist antibody for treating chemotherapy-induced thrombocytopenia
Source: Springer Nature journal article supplement (doi:10.1186/s12885-023-10975-3), 2023-05-31
Supplement: MOESM5 [file 25429238]

Supplementary Fig. 5 MPL signal transduction induced by 2R13 in human platelets from donor 2 and donor 3

**a**

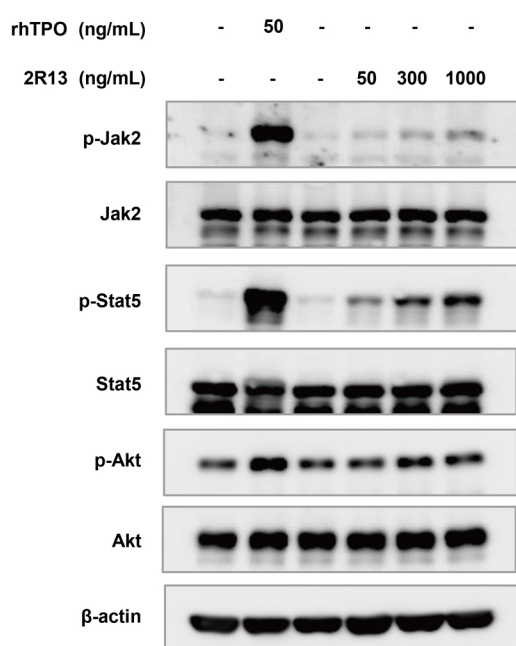

**b**

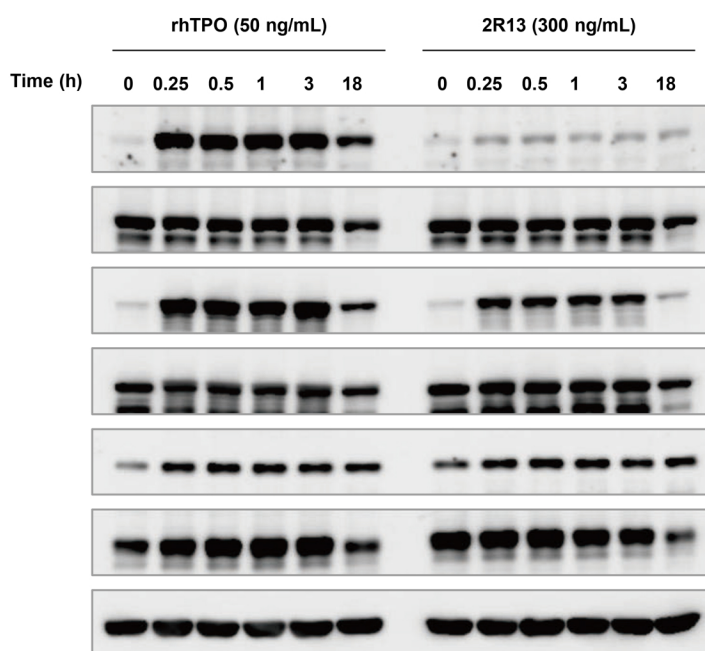

**c**

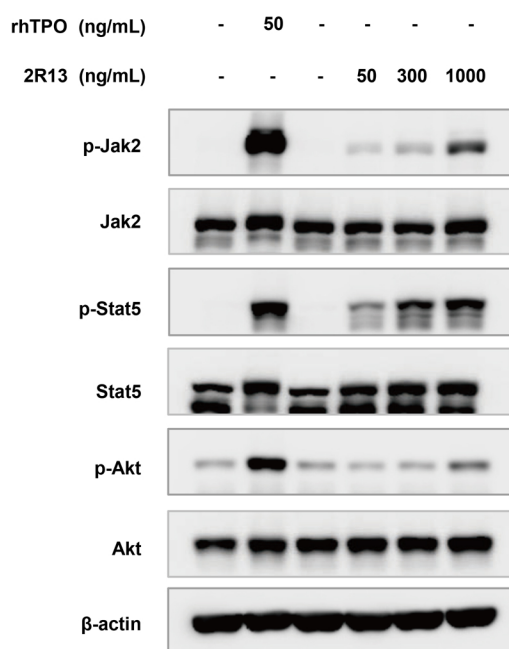

**d**

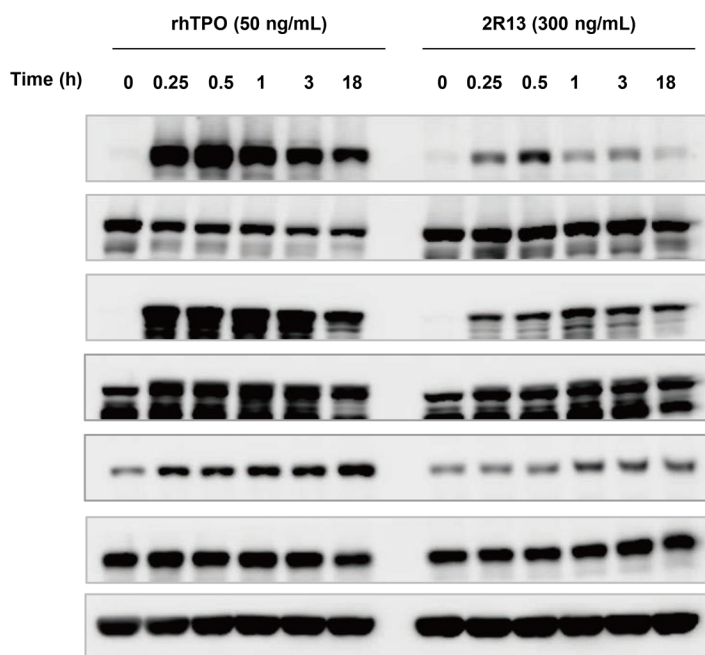

Western blot analysis of human platelets derived from donors 2 (**a, b**) and donor 3 (**c, d**), stimulated with rhTPO or 2R13, using the indicated antibodies. **a, c** rhTPO or 2R13 was added at the indicated concentrations for 30 min. **b, d** rhTPO (50 ng/mL) or 2R13 (300 ng/mL) was treated over the indicated period.
