# Supplementary material for: Thrombopoietin receptor agonist antibody for treating chemotherapy-induced thrombocytopenia
Source: Springer Nature journal article supplement (doi:10.1186/s12885-023-10975-3), 2023-05-31
Supplement: MOESM6 [file 25429238]

Supplementary Fig. 6 Flow cytometric analysis of LSK<sup>+</sup> cells

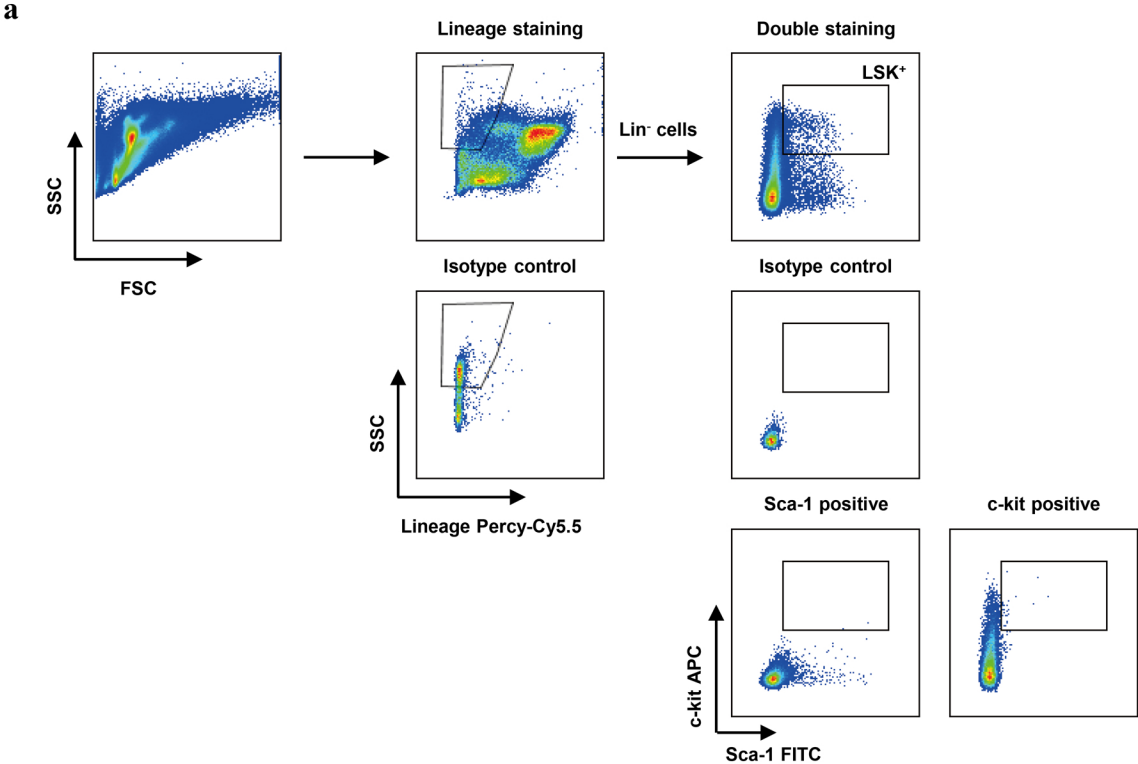

**a** Flow cytometry gating strategy used to isolate LSK<sup>+</sup> cells (Lin<sup>-</sup>/Sca-1<sup>+</sup>/c-kit<sup>+</sup>) derived from BM.
