# Supplementary material for: Thrombopoietin receptor agonist antibody for treating chemotherapy-induced thrombocytopenia
Source: Springer Nature journal article supplement (doi:10.1186/s12885-023-10975-3), 2023-05-31
Supplement: MOESM7 [file 25429238]

**Supplementary Fig. 7 Uncropped full-length images of western blotting membranes**

rhTPO (ng/mL)    -   1   3   10   30   100   -   -   -   -   -  
 2R13 (ng/mL)    -   -   -   -   -   -   1   3   10   30   100

rhTPO (ng/mL)    -   1   3   10   30   100   -   -   -   -   -  
 2R13 (ng/mL)    -   -   -   -   -   -   1   3   10   30   100

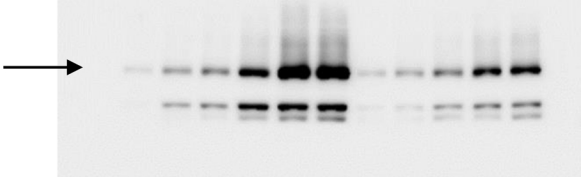

p-Jak2

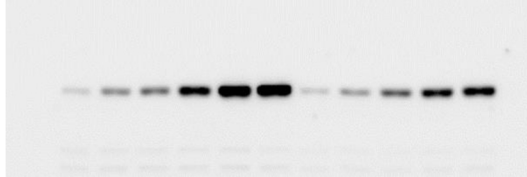

p-Akt

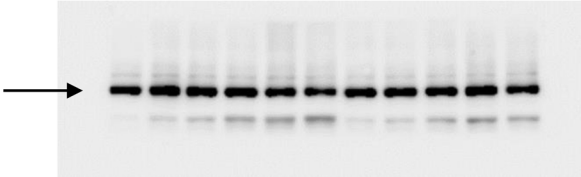

Jak2

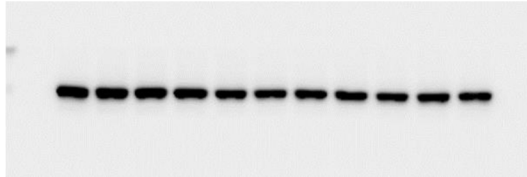

Akt

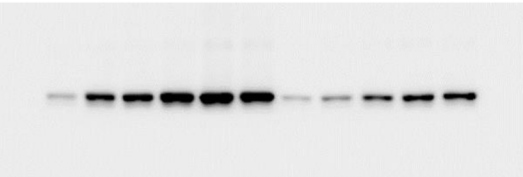

p-Stat5

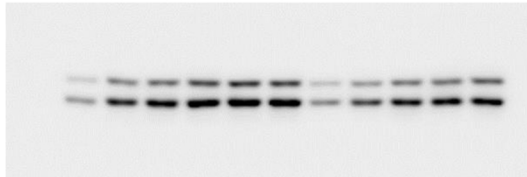

p-Erk

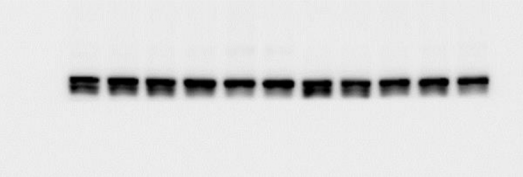

Stat5

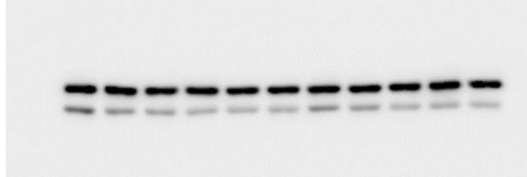

Erk

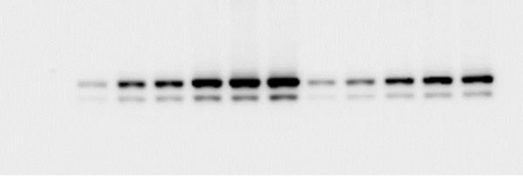

p-Stat3

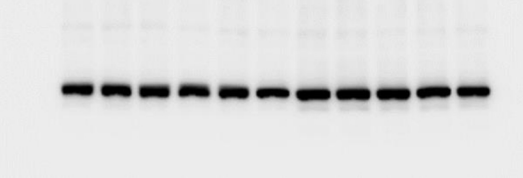

Stat3

Uncropped full-length images of western blotting membranes presented in Fig. 2d. Membranes were cut to enable blotting for multiple antibodies, and there are no images of adequate length.
