# Supplementary material for: Thrombopoietin receptor agonist antibody for treating chemotherapy-induced thrombocytopenia
Source: Springer Nature journal article supplement (doi:10.1186/s12885-023-10975-3), 2023-05-31
Supplement: MOESM8 [file 25429238]

**Supplementary Fig.8 Uncropped full-length images of western blotting membranes**

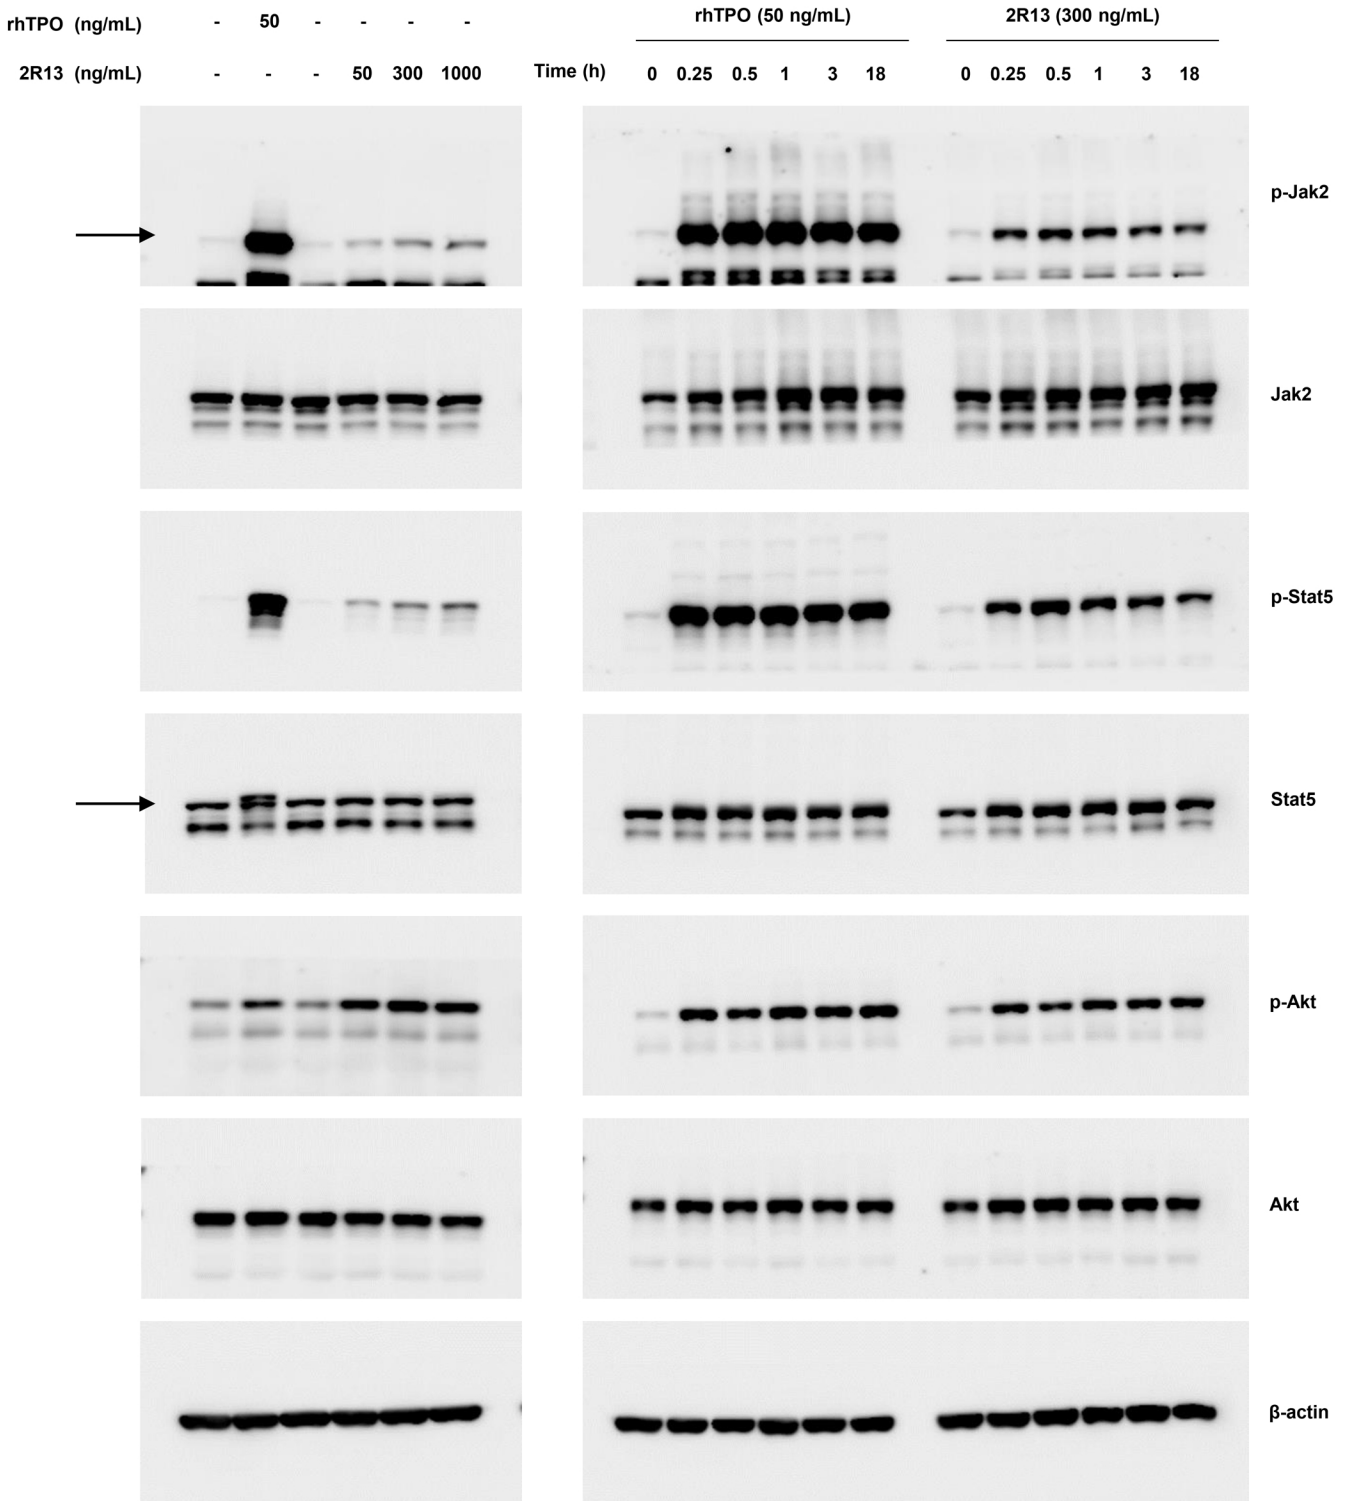

Uncropped full-length images of western blotting membranes presented in Fig. 5a and b. Membranes were cut to enable blotting for multiple antibodies, and there are no images of adequate length.
