# Supplementary material for: Thrombopoietin receptor agonist antibody for treating chemotherapy-induced thrombocytopenia
Source: Springer Nature journal article supplement (doi:10.1186/s12885-023-10975-3), 2023-05-31
Supplement: MOESM10 [file 25429238]

Supplementary Fig. 10 Uncropped full-length images of western blotting membranes

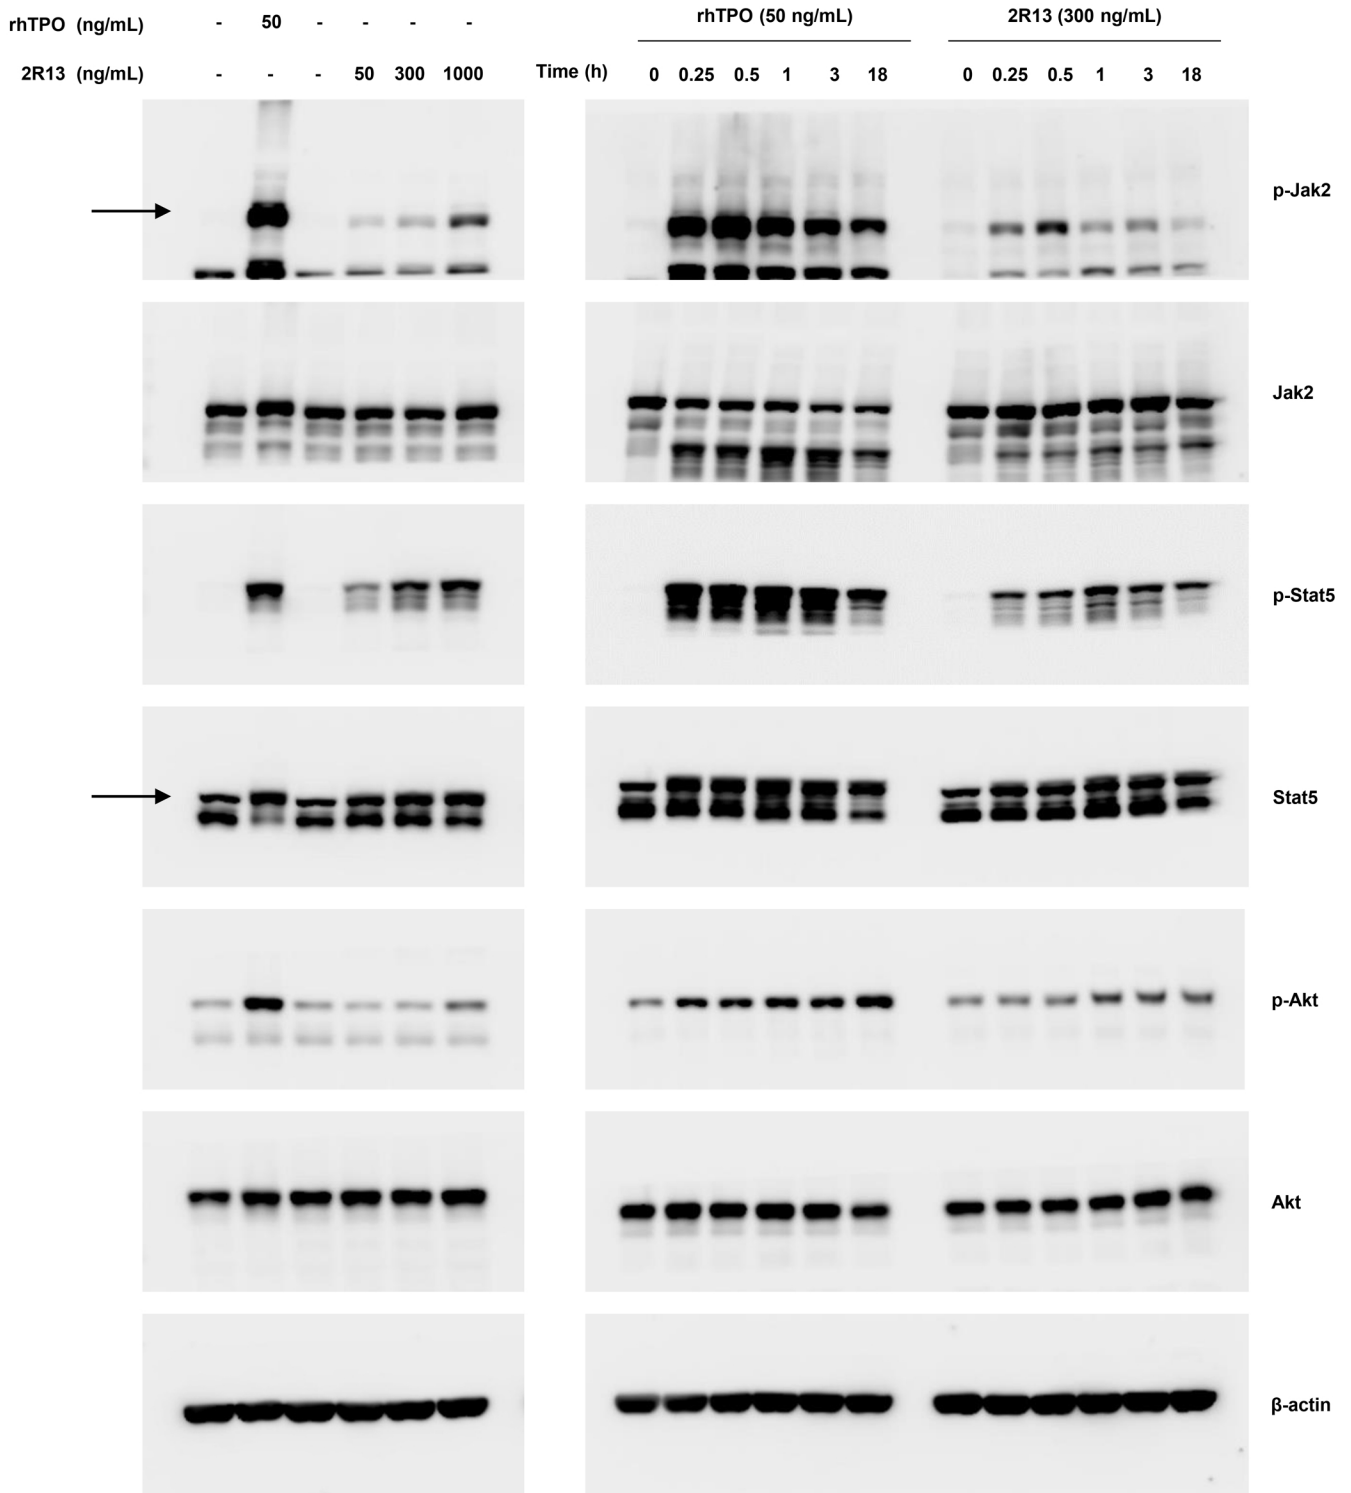

Uncropped full-length images of western blotting membranes presented in Supplementary Fig. 5c and d. Membranes were cut to enable blotting for multiple antibodies, and there are no images of adequate length.
